# Supplementary material for: Traumatic Fracture Treatment: Calcium Phosphate Bone Substitute Case–Control Study in Humerus, Radius, Tibia Fractures—Assessing Efficacy and Recovery Outcomes
Source: MDPI journal article supplement (doi:10.3390/biomedicines11102862), 2023-10-22
Supplement: s1 [file s1]

**Supplementary Data:**

**Table S1.** Radiological criteria for bone healing, modified after Bohndorf et al. [28], Freyschmidt et al. [29], and Islam et al. [30].

| <b>Criterion:</b> | <b>Classification:</b> | <b>Radiological criteria:</b>                                                                                                                                                                     |
|-------------------|------------------------|---------------------------------------------------------------------------------------------------------------------------------------------------------------------------------------------------|
| Edge of fracture  | 1                      | No visible edges                                                                                                                                                                                  |
|                   | 2                      | Dimly visible edges                                                                                                                                                                               |
|                   | 3                      | Blurred edge                                                                                                                                                                                      |
|                   | 4                      | Partly sharp-and partly blurred-edged                                                                                                                                                             |
|                   | 5                      | Sharp-edged                                                                                                                                                                                       |
| Fracture gap      | 1                      | No fracture gap: Bridging is completed                                                                                                                                                            |
|                   | 2                      | Condensation                                                                                                                                                                                      |
|                   | 3                      | Partly blurred and partly compressed                                                                                                                                                              |
|                   | 4                      | Blurred                                                                                                                                                                                           |
|                   | 5                      | Reduction in density and bone gap looks more impressive                                                                                                                                           |
| Articular surface | 6                      | Visible gap                                                                                                                                                                                       |
|                   | 1                      | No anomalies                                                                                                                                                                                      |
|                   | 2                      | Intraarticular fracture gap                                                                                                                                                                       |
|                   | 3                      | Intraarticular stage                                                                                                                                                                              |
|                   | 4                      | Intraarticular stage and intraarticular fracture gap                                                                                                                                              |
| Osteosynthesis    | 1                      | Explanation of osteosynthesis because of bone healing                                                                                                                                             |
|                   | 2                      | All fracture fragments are fixed, osteosynthesis screws are extraarticular, osteosynthesis plate is fitted tightly on the corticalis, and no material fracture                                    |
|                   | 3                      | All fracture fragments are fixed, osteosynthesis screws are extraarticular, osteosynthesis plate is fitted tightly on the corticalis, no material fracture, X-ray image while wearing gypsum      |
|                   | 4                      | Osteosynthesis screws are extraarticular, osteosynthesis plate is fitted tightly on the corticalis, no material fracture, and some fracture fragments are not fixed                               |
|                   | 5                      | Osteosynthesis screws are extraarticular, osteosynthesis plate is fitted tightly on the corticalis, no material fracture, some fracture fragments are not fixed, X-ray image while wearing gypsum |
|                   | 6                      | Pathological damages at the osteosynthesis, e.g.,:                                                                                                                                                |

|                |   |                                          |                                                |
|----------------|---|------------------------------------------|------------------------------------------------|
|                |   | -                                        | Plate is not fitting tightly to the corticalis |
|                |   | -                                        | Screws are intraarticular                      |
|                |   | -                                        | other pathology                                |
| Bone structure | 1 | Normal bone substance                    |                                                |
|                | 2 | Local condensation                       |                                                |
|                | 3 | Reduction of radiopaque at fracture tilt |                                                |
|                | 4 | Resorption of the fracture callus        |                                                |
